# Supplementary material for: LncRNAs downregulated in childhood acute lymphoblastic leukemia modulate apoptosis, cell migration, and DNA damage response
Source: PubMed Central journal article supplement (PMC5655227; doi:10.18632/oncotarget.20817), 2017-09-11
Supplement: oncotarget-08-80645-s001.pdf [file oncotarget-08-80645-s001.pdf]

## LncRNAs downregulated in childhood acute lymphoblastic leukemia modulate apoptosis, cell migration, and DNA damage response

### SUPPLEMENTARY MATERIALS

**Supplementary Table 1: Characteristics of PCR amplimers**

|               |         |                                                                 |
|---------------|---------|-----------------------------------------------------------------|
| RP11-624C23.1 | Forward | 5'- GGGGACAAGTTTGTACAAAAAAGCAGGCTGAACAAGTGGGGAGAAATCTTA-3'      |
|               | Reverse | 5'- GGGGACCACTTTGTACAAGAAAGCTGGGTGTTATGATTCCCATTTGGGTTG-3'      |
| RP11-203E8    | Forward | 5'-GGGGACAAGTTTGTACAAAAAAGCAGGCTAAAACCTTATCAATTTCTTATATTTTAT-3' |
|               | Reverse | 5'- GGGGACCACTTTGTACAAGAAAGCTGGGTCTCAAATTATACCCTCTTTGTAG-3'     |
| RP11-446E9.2  | Forward | 5'- GGGGACAAGTTTGTACAAAAAAGCAGGCTTCTCGAACTCCTGACCTCAGGC-3'      |
|               | Reverse | 5'- GGGGACCACTTTGTACAAGAAAGCTGGGTGTGTTTCACTGGTTTTATTTCACA-3'    |

**Supplementary Table 2: Characteristics of qPCR amplimers**

|               |         |                             |
|---------------|---------|-----------------------------|
| RP11-624C23.1 | Forward | 5'-CTGAGCCCTCTCTCCCAATA-3'  |
|               | Reverse | 5'-ATCACTGGGCAGGTCAAGAG-3'  |
| RP11-203E8    | Forward | 5'-CTCCCAATCCAAGAAACAG-3'   |
|               | Reverse | 5'-GCCAAAATCCTCTCCATCA-3'   |
| RP11-446E9.2  | Forward | 5'-CCCCGTCCTCTCACAACTA-3'   |
|               | Reverse | 5'-GACAACTGGCTGTGGAACCT-3'  |
| ADAM28        | Forward | 5'-AAGAACTCCCTGGGGTGAAG-3'  |
|               | Reverse | 5'-AAAGCACTGCAATTTTCCA-3'   |
| LYN           | Forward | 5'-CAGTACCAAGGTGGCTGTGA-3'  |
|               | Reverse | 5'GGCCATGTACTCGGTGATG-3'    |
| GAPDH         | Forward | 5'-TGCACCACCAACTGCTTAGC-3'  |
|               | Reverse | 5'-GGCATGGACTGTGGTCATGAG-3' |

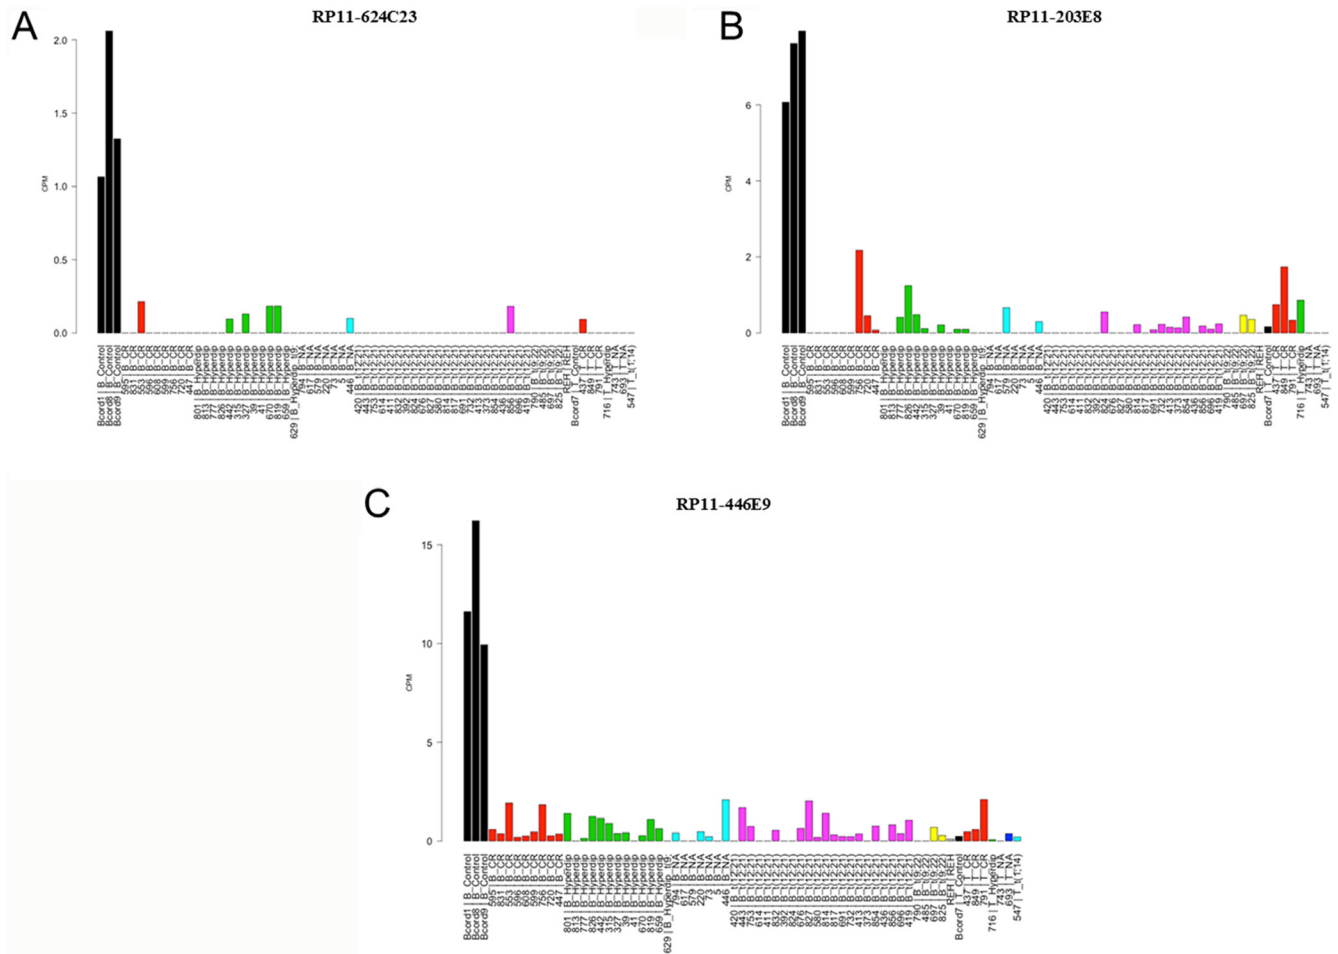

**Supplementary Figure 1: The expression of lncRNAs *RP11-624C23*, *RP11-203E8*, and *RP11-446E9* lncRNAs is downregulated in pre-B cALL patients.** RNA sequencing was performing on 63 patients, 3 normal samples as control and Reh cell line as described in Ouimet et al. and Lajoie et al.

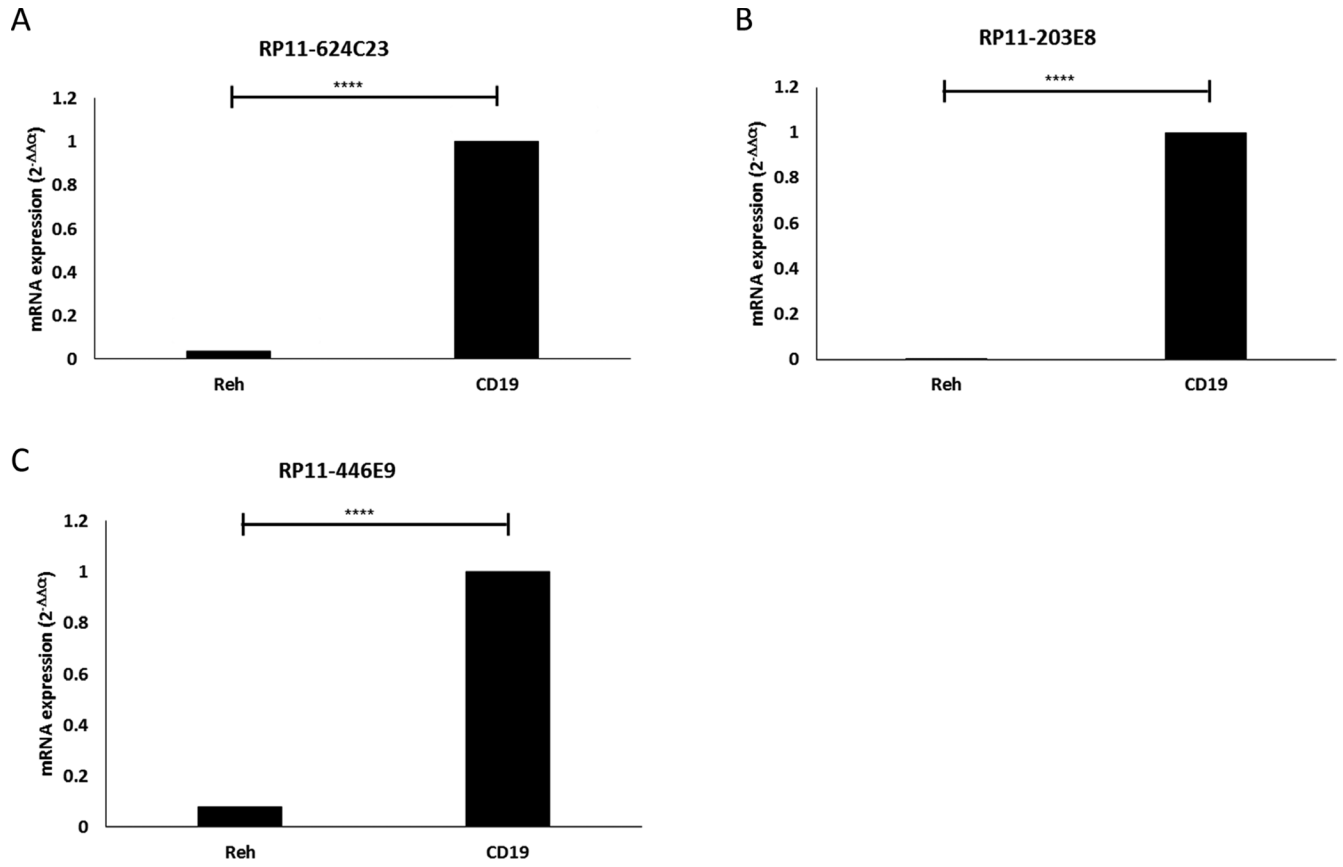

**Supplementary Figure 2: LncRNAs *RP11-624C23.1*, *RP11-203E8*, and *RP11-446E9* are down-regulated in Reh cell line.** QPCR of *RP11-624C23.1* (A), *RP11-203E8* (B), and *RP11-446E9* (C) lncRNAs were done on Reh using CD19<sup>+</sup> primary cell (CD19) as control. \*\*\*\* $P \leq 0.0001$ .

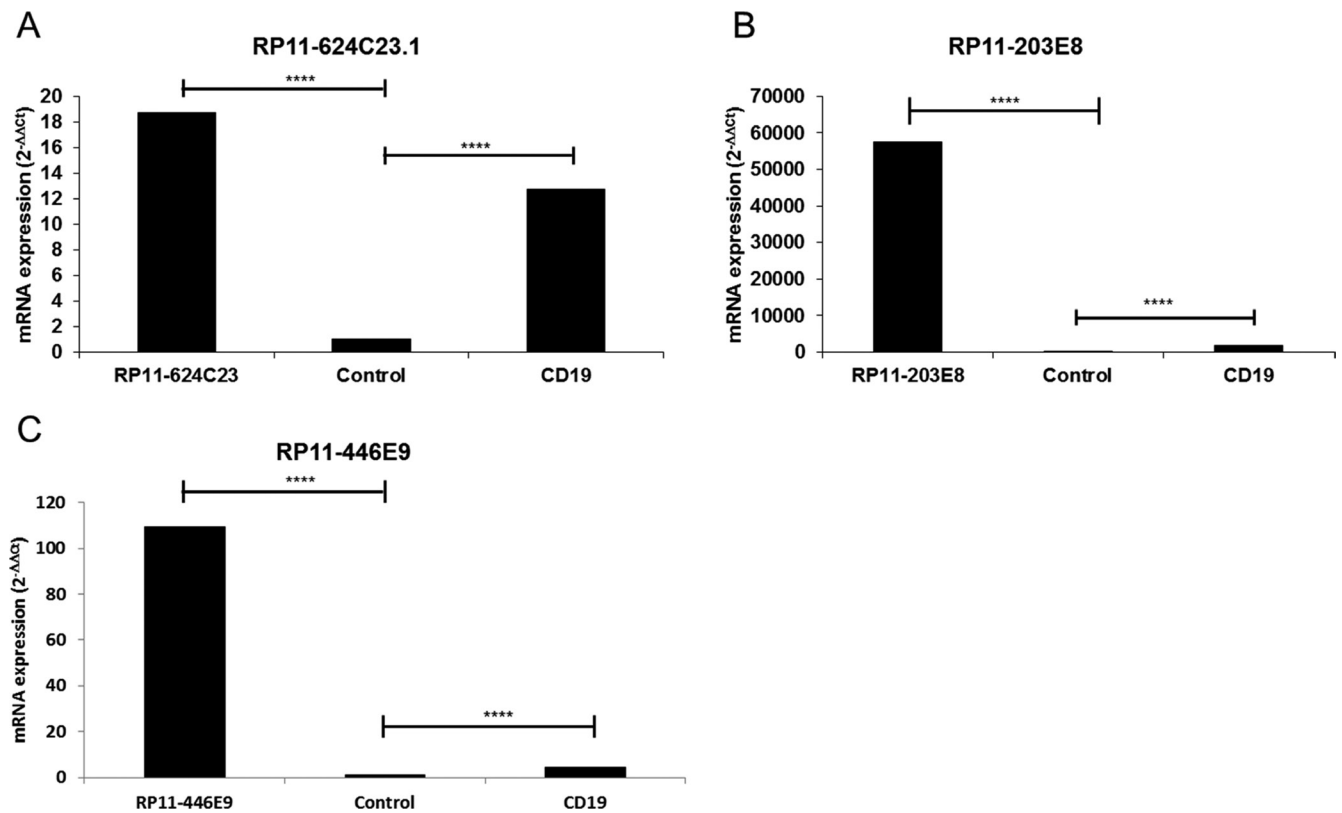

**Supplementary Figure 3: LncRNAs *RP11-624C23.1*, *RP11-203E8*, and *RP11-446E9* are up-regulated in constructs overexpressing them.** QPCR of *RP11-624C23.1* (A), *RP11-203E8* (B), and *RP11-446E9* (C) lncRNAs were done on Reh after infection with lentiviral expression vector. CD19<sup>+</sup> primary cell (CD19) and Reh-pLenti (Control) were used as controls. Results were normalized on *GAPDH* expression. \*\*\*\* $P \leq 0.0001$ .

A

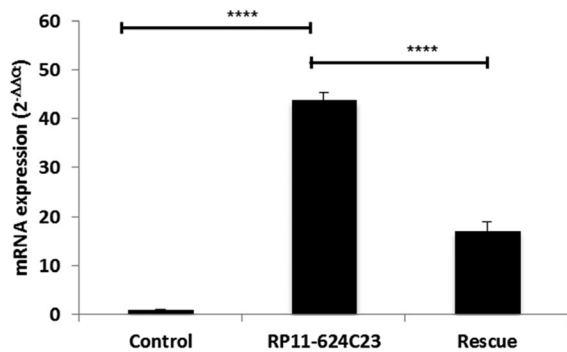

B

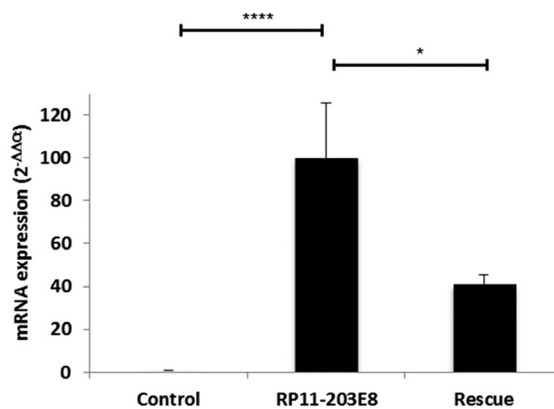

C

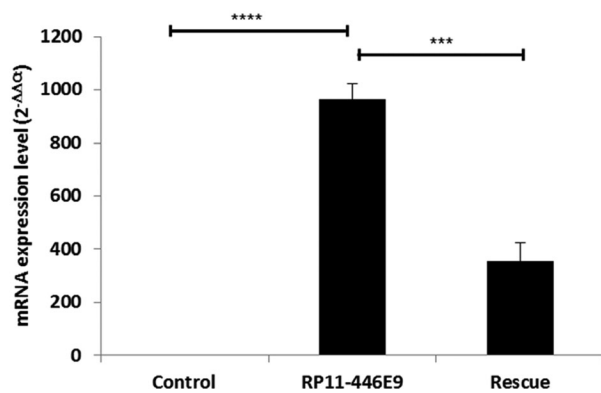

**Supplementary Figure 4: Overexpression of *RP11-624C23.1*, *RP11-203E8*, and *RP11-446E9* is repressed by shRNA-mediated silencing.** QPCR of *RP11-624C23.1* (A), *RP11-203E8* (B) and *RP11-446E9* (C) lncRNAs were done on Reh-*RP11-624C23.1* (A), Reh-*RP11-203E8* (B) and Reh-*RP11-446E9* (C) after shRNA-mediated silencing. Results were normalized on *GAPDH* expression. \*, \*\*\*, and \*\*\*\*  $P \leq 0.05$ ,  $\leq 0.005$  and  $\leq 0.0001$ , respectively.

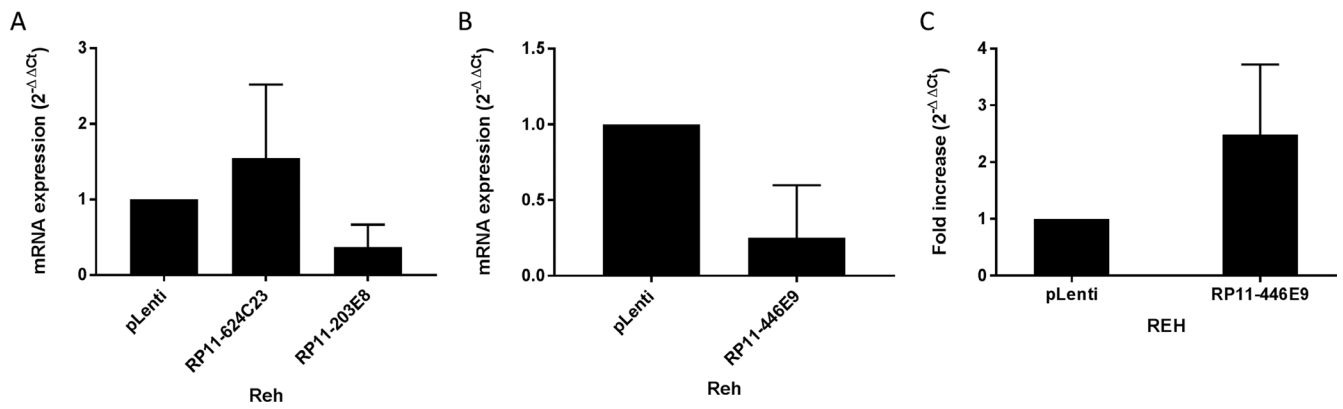

**Supplementary Figure 5: Expression levels of genes neighboring *RP11-624C23.1* and *RP11-203E8*.** QPCR of *ADAM28* (A), *LYN* (B), and *RPS* (C) were done in control empty vector Reh cells (pLenti) and Reh cells overexpressing *RP11-624C23.1* or *RP11-203E8*. Results were normalized on each respective gene's expression in the pLenti control.

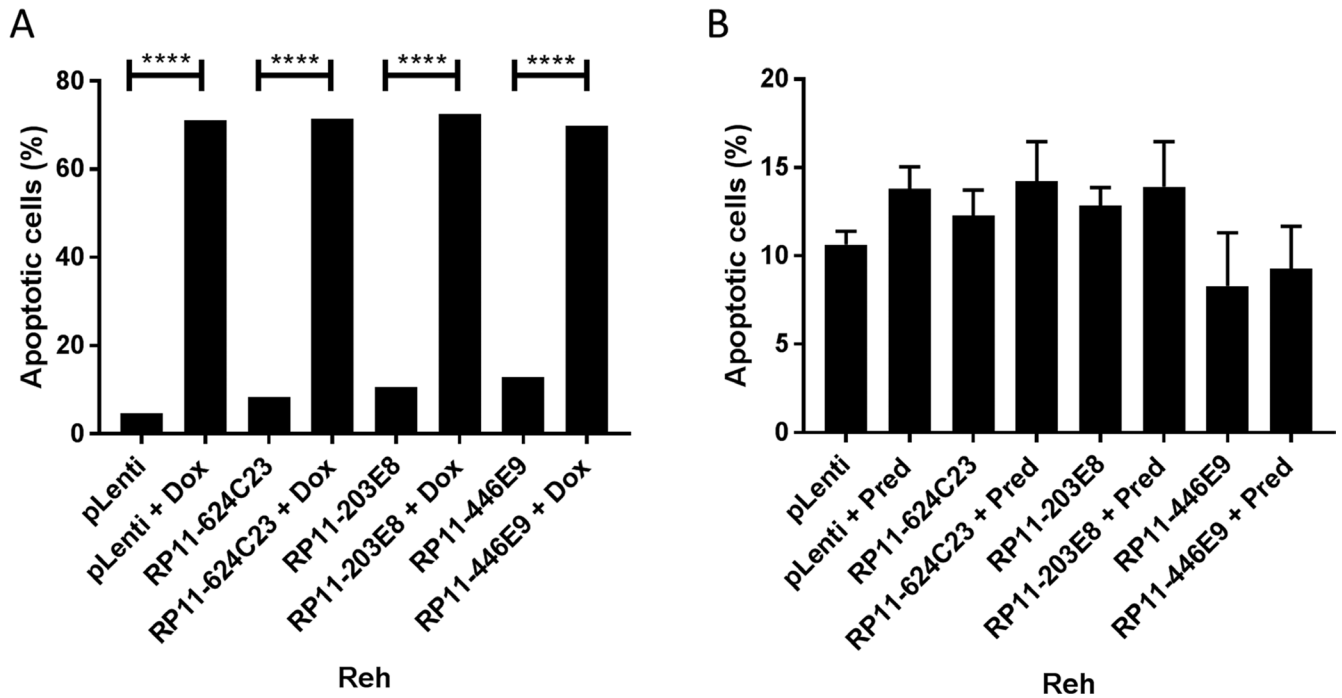

**Supplementary Figure 6: Doxorubicine and prednisolone sensitivity are not affected by *RP11-624C23.1*, *RP11-203E8*, or *RP11-446E9* overexpression.** Control (pLenti) Reh cells or Reh cells overexpressing *RP11-624C23.1*, *RP11-203E8*, or *RP11-446E9* were treated with doxorubicine (150 nM, 24 h) (A) or prednisolone (750  $\mu$ M, 24 h) (B). Apoptosis was measured using Annexin V/PI.

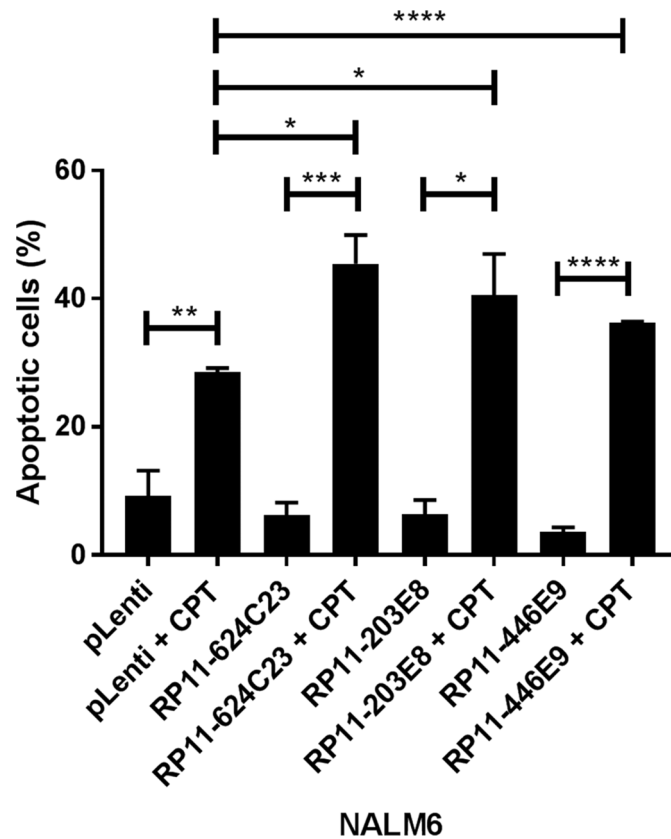

**Supplementary Figure 7: NALM-6 pre-B cALL cells overexpressing *RP11-624C23.1*, *RP11-203E8*, or *RP11-446E9* are sensitive to camptothecin treatment.** Control (pLenti) NALM-6 cells or NALM-6 cells overexpressing *RP11-624C23.1*, *RP11-203E8*, or *RP11-446E9* were treated with camptothecin (5 uM, 3 h). Apoptosis was measured using Annexin V/PI.

## REFERENCES

1. Ouimet M, Drouin S, Lajoie M, Caron M, St-Onge P, Gioia R, Richer C, Sinnett D. A childhood acute lymphoblastic leukemia-specific lncRNA implicated in prednisolone resistance, cell proliferation, and migration. *Oncotarget*. 2017; 8:7477–88. <https://doi.org/10.18632/oncotarget.13936>.
2. Lajoie M, Drouin S, Caron M, St-Onge P, Ouimet M, Gioia R, Lafond MH, Vidal R, Richer C, Oualkacha K, Droit A, Sinnett D. Specific expression of novel long non-coding RNAs in high-hyperdiploid childhood acute lymphoblastic leukemia. *PLoS One*. 2017; 12:e0174124. <https://doi.org/10.1371/journal.pone.0174124>.
